# Supplementary material for: Emotional blunting in patients with depression. Part II: relationship with functioning, well-being, and quality of life
Source: PubMed Central journal article supplement (PMC9210577; doi:10.1186/s12991-022-00392-4), 2022-06-20
Supplement: 12991_2022_392_MOESM1_ESM.pdf [file 12991_2022_392_MOESM1_ESM.pdf]

## Additional file 1

**Table S1** Clinical assessment scores for the patient-reported cohort by country.

| <b>Clinical assessment scores, mean (SD)</b> | <b>Brazil<br/>(n = 251)</b> | <b>Canada<br/>(n = 251)</b> | <b>Spain<br/>(n = 250)</b> |
|----------------------------------------------|-----------------------------|-----------------------------|----------------------------|
| ODQ total score                              | 89.9 (18.3)                 | 88.4 (18.4)                 | 89.6 (18.2)                |
| FAST total score                             | 44.2 (16.7)**               | 35.9 (16.0)                 | 35.7 (17.8)                |
| WHO-5 total score                            | 8.2 (5.3)                   | 8.8 (5.8)                   | 8.4 (5.4)                  |

Difference versus Canada and Spain, \*\* $p < 0.01$ .

FAST, Functioning Assessment Short Test; ODQ, Oxford Depression Questionnaire, SD, standard deviation; WHO-5, World Health Organization-Five Well-Being Index.
